# Supplementary material
Source: PubMed Central journal article supplement (PMC5860218)
Supplement: kwx224parkswebmaterialfinal.pdf [file kwx224parkswebmaterialfinal.pdf]

Web Table 1. Associations of rheumatoid arthritis with childhood residential pesticides, depending on adult use and stratified by birth cohort in the Sister Study (U.S. 2004-2009)

|                                  | <b>1928-1944</b>                                  | <b>1945-55</b>    | <b>1956+</b>      |
|----------------------------------|---------------------------------------------------|-------------------|-------------------|
| Residential pesticide exposures  | Age-adjusted Odds Ratio (95% Confidence Interval) |                   |                   |
| <i>Number of cases/non-cases</i> |                                                   |                   |                   |
| <b><i>No adult use</i></b>       | <i>82 / 6,878</i>                                 | <i>80 / 9,692</i> | <i>37 / 8,102</i> |
| No childhood use                 | 1.0 (referent)                                    | 1.0 (referent)    | 1.0 (referent)    |
| Indirect childhood use           | 1.6 (0.86, 3.0)                                   | 0.38 (0.95, 1.3)  | 1.0 (0.42, 2.4)   |
| Direct childhood use             | NC                                                | NC                | NC                |
| <b><i>Any adult use</i></b>      | <i>56 / 5,219</i>                                 | <i>75 / 7,232</i> | <i>40 / 5,921</i> |
| No childhood use                 | 1.0 (referent)                                    | 1.0 (referent)    | 1.0 (referent)    |
| Indirect childhood use           | 1.2 (0.61, 2.2)                                   | 1.8 (1.1, 3.0)    | 1.3 (0.67, 2.6)   |
| Direct childhood use             | NC                                                | 3.2 (1.4, 7.3)    | 3.5 (1.4, 8.9)    |

NC=not calculated due to fewer than 4 exposed cases



Web Table 2. Associations of rheumatoid arthritis with maternal farm residence and childhood agricultural pesticides in the Sister Study (United States, 2004-2009), by birth cohort

|                                                       | <b>1928-1944</b>                                   | <b>1945-55</b>      | <b>1956+</b>       |
|-------------------------------------------------------|----------------------------------------------------|---------------------|--------------------|
| Early life farm residence and pesticides <sup>a</sup> | Odds Ratios (95% Confidence Interval) <sup>b</sup> |                     |                    |
| <i>Number of cases/non-cases</i>                      | <i>141 / 13,935</i>                                | <i>156 / 16,838</i> | <i>76 / 13,935</i> |
| <b><i>Maternal farm experience</i></b>                |                                                    |                     |                    |
| No                                                    | 1.0 (referent)                                     | 1.0 (referent)      | 1.0 (referent)     |
| Yes                                                   | 1.0 (0.60, 1.7)                                    | 0.68 (0.37, 1.2)    | 2.0 (1.0, 4.5)     |
| <b><i>Childhood-only agricultural pesticides</i></b>  |                                                    |                     |                    |
| No lifetime farm residence                            | 1.0 (referent)                                     | 1.0 (referent)      | 1.0 (referent)     |
| Childhood-only farm, no pesticides                    | 1.3 (0.70, 2.3)                                    | 0.61 (0.22, 1.7)    | NC                 |
| Childhood-only farm, pesticides on crops/animals      | 1.8 (1.0, 3.1)                                     | 2.0 (1.1, 3.6)      | 1.1 (0.45, 2.6)    |

<sup>a</sup>Excluding those with adult farm residence

<sup>b</sup>Model includes age, childhood pesticide use and maternal farm residence
